# Supplementary material
Source: HighWire-hosted journal article supplement (https://bmjopen.bmj.com/content/15/5/e099547)
Supplement: inline-supplementary-material-3 [file inline-supplementary-material-3.pdf]

## Complete Medication Documentation at Discharge Measure (CMDD-M)

(Unofficial English version, translated from Swedish)

| Item                                                                 | Discharge letter (intended for the patient)                                                                                                                                                                                                                                                                                                                                                                          | Points |
|----------------------------------------------------------------------|----------------------------------------------------------------------------------------------------------------------------------------------------------------------------------------------------------------------------------------------------------------------------------------------------------------------------------------------------------------------------------------------------------------------|--------|
| 1                                                                    | The discharge letter includes a description of medication changes <ul style="list-style-type: none"> <li>- 0 points: No</li> <li>- 1 point: Yes</li> </ul>                                                                                                                                                                                                                                                           | 0-1    |
| 2                                                                    | <b>All</b> medication changes are explicitly* stated ( <i>including duration/end date if time-limited</i> ) <ul style="list-style-type: none"> <li>- 0 points: No</li> <li>- 2 points: Yes</li> </ul>                                                                                                                                                                                                                | 0 or 2 |
| 3                                                                    | Reasons for <b>all</b> medication changes are stated <ul style="list-style-type: none"> <li>- 2 points: The reason for <b>all</b> changes is included</li> <li>- 1 point: The reason for at least one change is included</li> <li>- 0 points: No reasons are stated <ul style="list-style-type: none"> <li>○ Automatically scored 0 points if item 2 is scored 0</li> </ul> </li> </ul>                              | 0-2    |
| <b>Discharge summary (intended for the next healthcare provider)</b> |                                                                                                                                                                                                                                                                                                                                                                                                                      |        |
| 4                                                                    | Information about medication treatment is included in the discharge summary ( <i>sufficient if medications at discharge are listed, or if it is stated that medication changes have been made</i> ) <ul style="list-style-type: none"> <li>- 0 points: No</li> <li>- 1 point: Yes</li> </ul>                                                                                                                         | 0-1    |
| 5                                                                    | <b>All</b> medication changes are stated <ul style="list-style-type: none"> <li>- 2 points: <b>All</b> medication changes are explicitly* stated</li> <li>- 1 point: <b>All</b> changes are stated in a general** way</li> <li>- 0 points: At least one change is missing, or incorrectly stated <ul style="list-style-type: none"> <li>○ Automatically scored 0 points if item 4 is scored 0</li> </ul> </li> </ul> | 0-2    |
| <b>Referral</b>                                                      |                                                                                                                                                                                                                                                                                                                                                                                                                      |        |
| 6                                                                    | A referral is sent to the next healthcare provider <ul style="list-style-type: none"> <li>- 0 points: No referral and medication changes were made</li> <li>- 1 point: Yes, or no referral needed (no medication changes made)</li> </ul>                                                                                                                                                                            | 0-1    |
|                                                                      | <b>Total</b>                                                                                                                                                                                                                                                                                                                                                                                                         | 0-9    |

\* Explicitly: For initiation and changes, state the medication name, strength, dose, dosage, and dosage form. For discontinuation state the medication name.

\*\* General: For example, "Pain relief treatment initiated".

## Standard Operating Procedure (SOP) for using the CMDD-M

### General Guidelines for Assessment

#### Identifying medication changes

- Medications at admission: Check the historical medication list from the day of admission. (Note: Admission could have been in another department.)
- Medications at discharge: Check the historical medication list from the day of discharge.
- Not considered a change:
  - o Medications added or removed from the medication list during a medication reconciliation at admission (these are corrections, not changes) as noted in the doctor's or pharmacist's note.
  - o Over-the-counter creams that can be purchased without prescription, regardless of the change made.
- Examples of how to assess combination preparations:
  - o If Ramipril Comp is discontinued and Ramipril is initiated, this counts as 1 discontinuation and 1 initiation.
  - o If two separate medications are switched to a combination preparation this counts as 2 discontinuations and 1 initiation.

### Item-Specific Guidelines for Assessment

#### Items 2 and 5

- For initiation or changes to a medication, then name, strength, dose, dosage, and dosage form must be explicitly stated.
- For discontinuation, only the name must be stated.
- Medications prescribed solely for use during the hospital stay do not need to be included, such as intravenous antibiotics, insulin, infusion fluids, and similar medications.

#### Item 3

- The reason for a medication change may be acceptable if stated in general terms such as "for the heart", depending on the recipient.

#### Item 5

- Examples of general ways to state medication changes include:
  - o "Blood pressure medication reduced"
  - o "Pain relief treatment initiated"
- Simply stating "new medications prescribed" is not sufficient.
